# Supplementary material for: Eutectic solvent-mediated selective synthesis of Cu–Sb–S-based nanocrystals: combined experimental and theoretical studies toward highly efficient water splitting
Source: Royal Society of Chemistry journal article supplement (doi:10.1039/c8ta07400c), 2018-01-01
Supplement: c8ta07400c1.pdf [file c8ta07400c1.pdf]

## Supporting Information

### Eutectic solvent-mediated selective synthesis of Cu-Sb-S-based nanocrystals: Combined experimental and theoretical studies toward highly efficient water splitting

Uma V. Ghorpade<sup>a†</sup>, Mahesh P. Suryawanshi<sup>a†</sup>, Seung Wook Shin<sup>b,c</sup>, Xiaoming Wang<sup>b</sup>, Eunae Jo<sup>a</sup>, Hyojung Bae<sup>d</sup>, KuSung Park<sup>c</sup> Jun-Seok Ha<sup>d</sup>, Sanjay S. Kolekar<sup>e\*</sup>, Jin Hyeok Kim<sup>a\*\*</sup>

<sup>a</sup>Optoelectronics Convergence Research Center and Department of Materials Science and Engineering and, Chonnam National University, 300, Yongbong-Dong, Buk-Gu, Gwangju 61186, South Korea

<sup>b</sup>Department of Physics and Astronomy and Wright Center for Photovoltaic Innovation and Commercialization, University of Toledo, Toledo, Ohio, 43606, USA

<sup>c</sup>Future Agricultural research Division, Water Resource and Environment Research Group, Rural Research Institute, Korea Rural Community Corporation, Ansan-Si, Gyeonggi-do, 15634, Korea.

<sup>d</sup>Department of Chemical Engineering, Chonnam National University, Gwangju 61186, Republic of Korea

<sup>e</sup>Analytical Chemistry and Material Science Research Laboratory, Department of Chemistry, Shivaji University, Kolhapur 416-004, India

#### Nanocrystals (NCs) synthesis:

For the synthesis of Cu<sub>3</sub>SbS<sub>4</sub> NCs, reaction mixture was prepared by stirring and heating the DESs at 80 °C in three-neck round bottom flasks along with Cu (II) acetate (3 mmol), Sb (III) acetate (1 mmol) and thioacetamide (4 mmol). The flask was formerly allowed to evacuate and further kept under argon gas throughout the reaction. The reaction temperature was raised up to 120 °C and the reaction mixture allowed to age for 15 min. After completion of the reaction, the resulting solution was cooled to room temperature, and ethanol was added to collect NCs, which was then separated by centrifuging. After adequate washing processes, collected material was allowed to dry in vacuum oven.

The above-mentioned experimental procedure was followed for the synthesis of CuSbS<sub>2</sub> NCs, except that Cu (II) acetate (1.66 mmol) and Sb (III) acetate (1.66 mmol) and thioacetamide (4.33 mmol) were used and allowed to react at 140 °C for 15 min. Similar procedure followed for the synthesis of Cu<sub>3</sub>SbS<sub>3</sub> NCs with Cu (II) acetate (3 mmol) and Sb (III) acetate (1 mmol) and thioacetamide (3 mmol) at 130 °C for 30 min.

Correspondingly Cu (II) acetate (3 mmol) and Sb (III) acetate (1 mmol) and thioacetamide (3.25 mmol) was allowed to react for 140 °C for 15 min. for Cu<sub>12</sub>Sb<sub>4</sub>S<sub>13</sub> NCs and followed the centrifugation and drying process.

In case Cu<sub>3</sub>SbS<sub>4</sub> and CuSbS<sub>2</sub> NCs, synthesis parameters, such as reaction temperature (from 80 to 160 °C) and time (From 5 min. to 2 hours) were varied for their phase purity. The quantitative percentage yield for optimized Cu<sub>3</sub>SbS<sub>4</sub> and CuSbS<sub>2</sub> NCs was estimated to be 71 and 83% respectively.

As synthesized Cu<sub>3</sub>SbS<sub>4</sub> and CuSbS<sub>2</sub> NCs are used for further thin film formation. Toluene dispersion of the corresponding NCs were permitted to spin coat for desired thickness. Afterwards, the films were allowed to bake under controlled air atmosphere on hot plate with facing glass funnel at 300 °C for 15 min. The annealing of the respective film through conventional furnace/rapid thermal annealing process was avoided.

### Surface Modification with n-type CdS:

Surface modifications of the  $\text{Cu}_3\text{SbS}_4$  and  $\text{CuSbS}_2$  films with n-type CdS layer compounds were performed by using the chemical bath deposition. The procedure of CdS thin film deposition in a hot alkaline medium were adopted from our previously published paper.<sup>1</sup> The reaction mixture was prepared by using 0.2 M  $\text{CdSO}_4$ , 0.84 M ammonia and 1.02 M thiourea solution with controlled pH of 11. Above synthesized nanoparticulate thin films were directly immersed in a reaction bath maintained at 80 °C for 8 min. After the deposition, the films were taken out from the reaction bath, rinsed with distilled water and dried in air at room temperature. The CdS modified  $\text{Cu}_3\text{SbS}_4$  and  $\text{CuSbS}_2$  absorbers were allow to heat treat at 100 °C for 60 min. in an air atmosphere.

### Surface Modification with Pt:

Pt coating on the Cu-Sb-S NCs based thin film and Cu-Sb-S NCs based thin film/CdS was deposited via sputtering for 150 s at room temperature.

### Characterization

The structural properties of the NCs were examined by X-ray diffraction (XRD, PANalytical, X'Pert-PRO Netherlands, voltage: 45 kV, current: 40 mA with Ni-filtered  $\text{Cu-K}\alpha$  radiation ( $\lambda = 1.54056 \text{ \AA}$ ). Raman spectroscopy was recorded using Raman microscope (LabRam HR8000 UV, (Horiba Jobin-Yvon, France), KBSI, Gwangju center). Field emission scanning electron microscopy (FE-SEM, S4800, HITACHI Inc., voltage: 10 kV and current: 20 mA) and high-resolution transmission electron microscopy (HR-TEM, JEOL-3010, acceleration voltage of 300 kV) was used to study the morphology. The elemental mapping images and the compositional ratios were analyzed by an energy-dispersive X-ray spectra (EDS) attached to the FE-SEM (Model Hitachi S 4800, Japan) measured at Korean Basic Science Institute. TEM sampling were carried out by drop casting of NCs dispersed in toluene onto carbon meshed nickel TEM grids (200 meshes, Structure Probe, Inc.). Photoluminescence (PL) spectra were measured on a Horiba-Yvon Fluoromax 4 at room temperature. The UV-Visible spectra of each photoelectrode were obtained with Cary 100 (Varian, Mulgrave, Australia) spectrometer at room temperature. Valence band offset (VBO) was measured with ultraviolet photoelectron spectroscopy (UPS) (Thermo VG Scientific, U. K.) with He I (21.22 eV) radiation source. The chemical states of NCs were examined using a HR-X-ray photoelectron spectroscopy (HR-XPS, VG Multi lab 2000, Thermo VG Scientific, UK) with a monochromatic  $\text{Mg-K}\alpha$  (1253.6 eV) radiation source. High resolution electrospray ionization mass spectroscopy (ESI-MS) spectra of the DESs were collected from SYNAPT G2 (Waters, U. K. in the positive ion mode using a unit mass resolution microchannel plate (MCP) detector with equipped with a ESI sources assisted by compressed Ar and electrical pumping for the spray solvent. Mass spectra were accumulated over 60 s and scanned over the  $m/z$  100-1000 range. The thermal behavior of the solvent was examined under  $\text{N}_2$  atmosphere by thermogravimetry coupled with differential scanning calorimetry (SDT Q600, TA Instruments). The surface structure of the NCs was determined by attenuated total reflection Fourier transformed infrared (FTIR) on a spectrophotometer (PerkinElmer, Frontier-89063) at room temperature.  $^1\text{H}$  nuclear magnetic resonance ( $^1\text{H-NMR}$ ) was recorded in deuterium oxide ( $\text{D}_2\text{O}$ , 99.9%, Sigma Aldrich) on a Bruker 500 MHz Avance to elucidate the structural characteristics of the DESs.

### Photoelectrochemical (PEC) measurements

The PEC measurements were carried out by following our previously used analysis.<sup>2</sup> The PEC measurements of three-electrode was carried under light illumination using a potentiostat (CHI Instruments, USA) with Pt plate as a counter electrodes, saturated (sat.)  $\text{Ag/AgCl}$  electrodes as a reference electrode. Nitrogen bubbled mixture of 0.5 M  $\text{KH}_2\text{PO}_4$ /0.5 M  $\text{Na}_2\text{SO}_4$  aqueous electrolyte of pH ~ 4.3 was used during PEC measurements. A Xe lamp was used as a light source at 150 W with a light intensity of 100  $\text{mW/cm}^2$  with an AM 1.5 filter. Linear sweeps voltammograms (LSVs) under the chopped light on/off illumination were performed at a scan rate of 10  $\text{mV/s}$  during the potential sweep. The calibration was performed by using an NREL-certified silicon photodiode.

### Gas evolution measurements

An air-tight three-electrode PEC quartz cell reactor with an  $\text{Ag/AgCl}$  reference electrode, and a Pt wire counter electrode was used for gas chromatography measurements. Photocathodes biased at 0  $V_{\text{RHE}}$  in an aqueous solution of 0.5 M  $\text{H}_2\text{SO}_4$  (pH ~ 0.5) under AM 1.5G simulated sunlight. During irradiation, the headspace gas (50 ml) of the reactor was intermittently sampled and analyzed for  $\text{H}_2$  using a gas chromatography (Agilent, 7820A Agilent technology, Santa Clara, California, USA) equipped with a thermal conductivity detector and a molecular sieve 5 $\text{\AA}$  column.

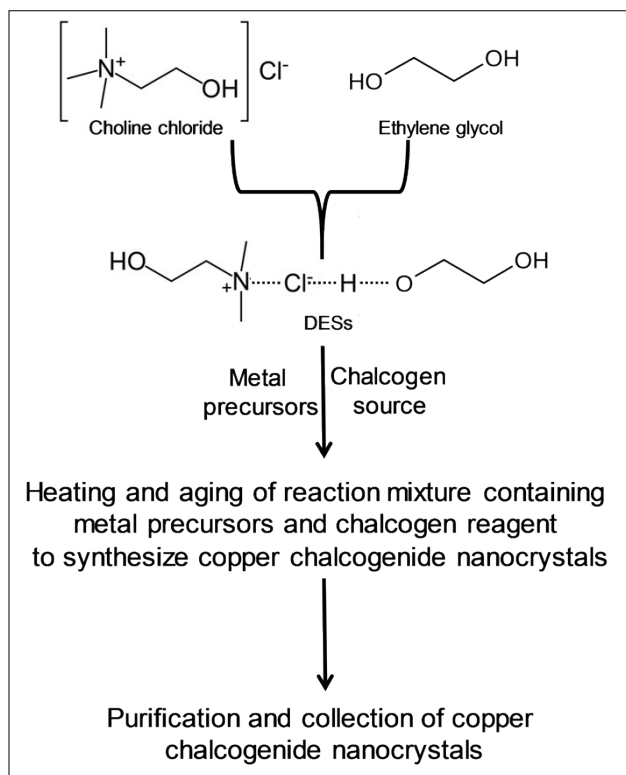

Scheme S1. Reaction pathway for Cu-Sb-S based NCs synthesis process.

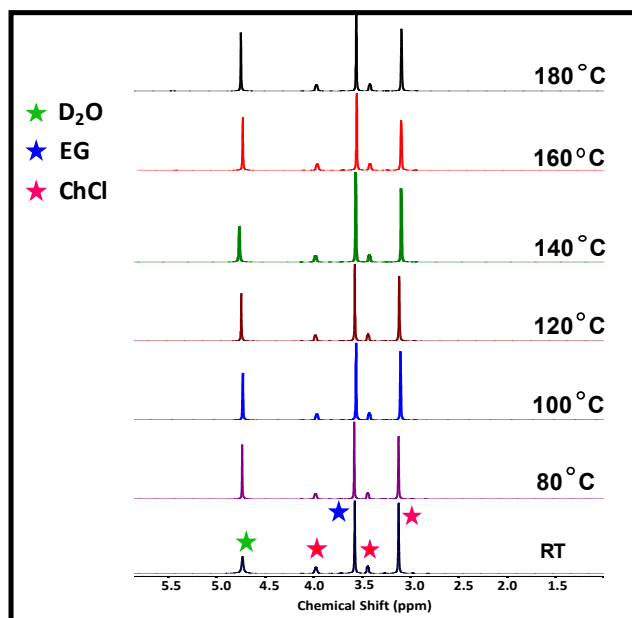

Fig. S1.  $^1\text{H}$  NMR spectra of without and with heat treated ethaline DES.  $^1\text{H}$  NMR was taken at room temperature in  $\text{D}_2\text{O}$ .

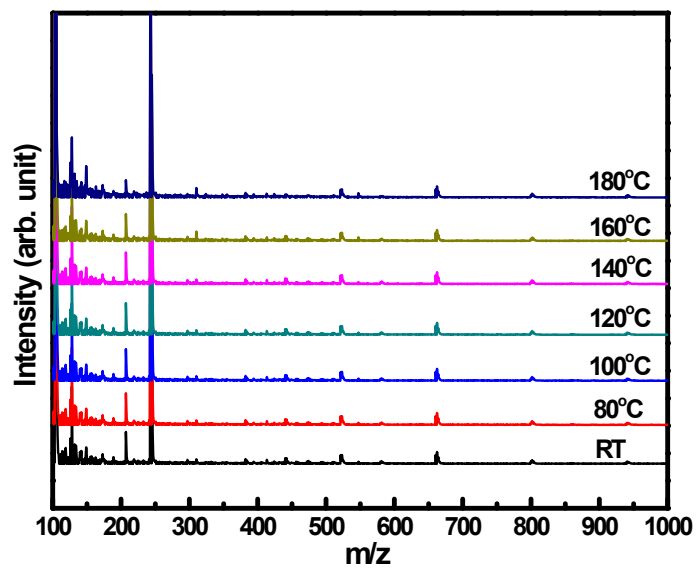

Fig. S2. ESI-MS spectra of ethaline DES without and with heat treatment.

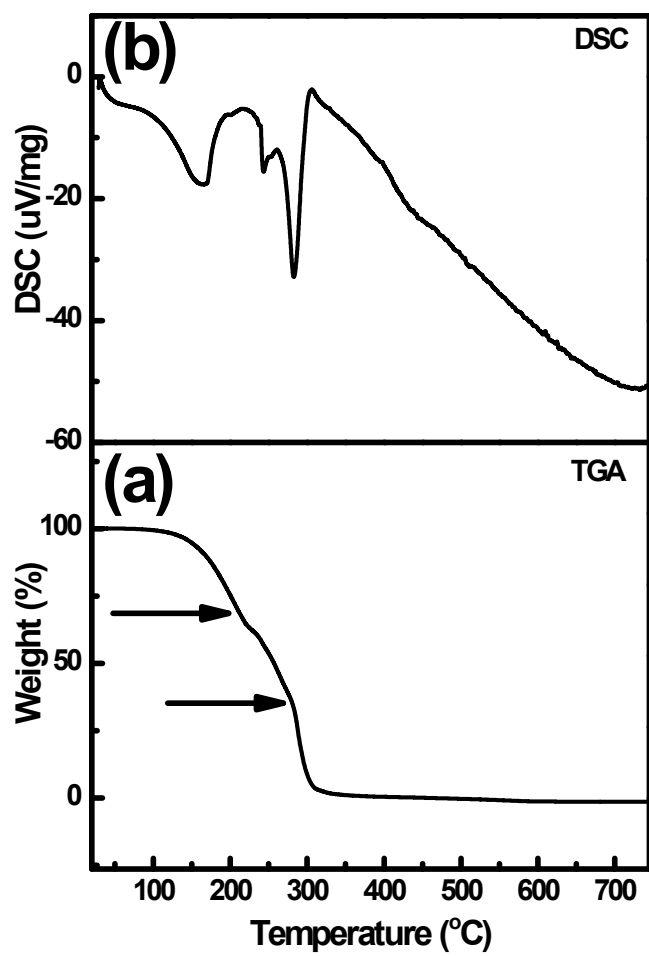

Fig. S3. (a) TGA and (b) DSC analysis of ethaline DES using 1:2 molar of choline chloride and ethylene glycol.

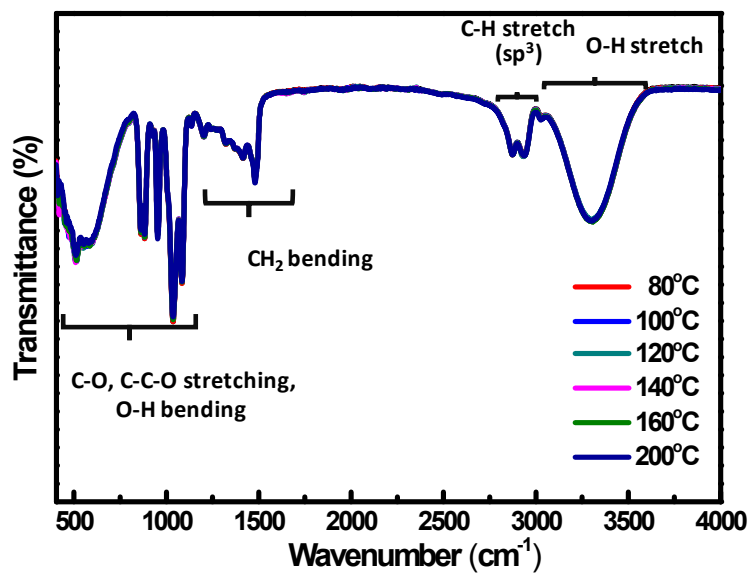

Fig. S4. FTIR spectra of heat treated ethaline DESs

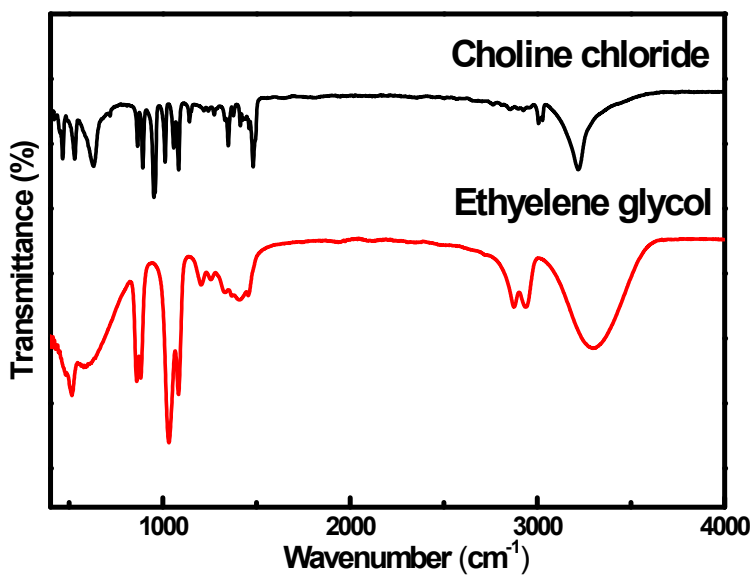

Fig. S5. Room temperature FTIR spectra of choline chloride and ethylene glycol, individual components of the ethaline.

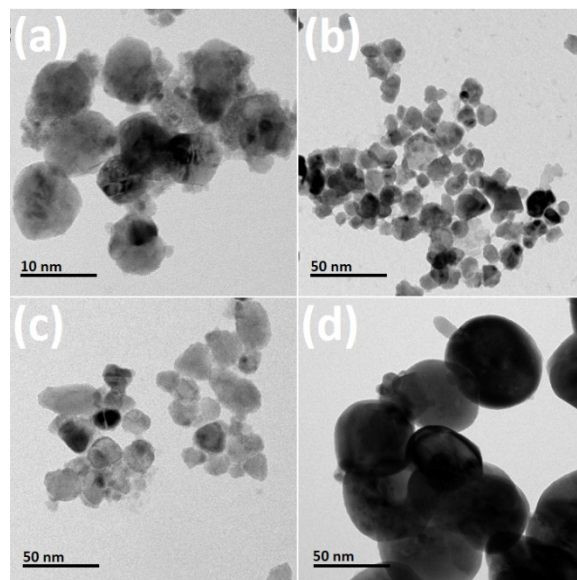

Fig. S6. Low-magnified TEM images of (a)  $\text{Cu}_3\text{SbS}_4$ , (b)  $\text{CuSbS}_2$ , (c)  $\text{Cu}_3\text{SbS}_3$  and (d)  $\text{Cu}_{12}\text{Sb}_4\text{S}_{13}$  NCs.

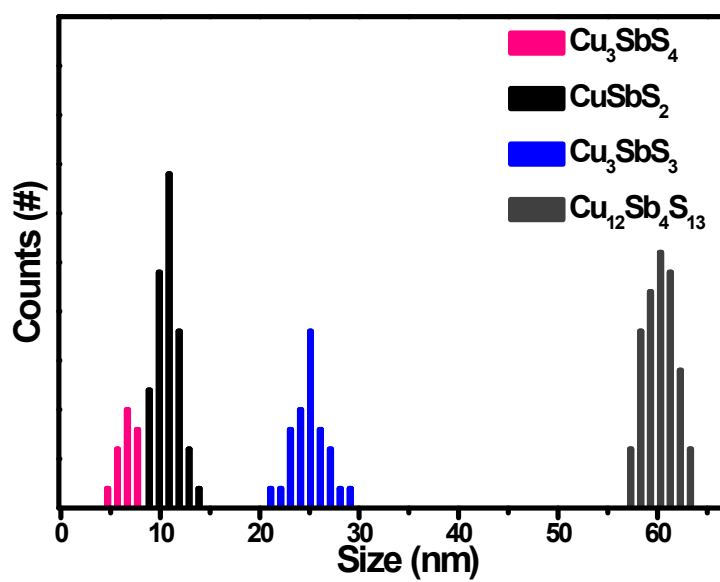

Fig. S7. Size distribution histogram of (a)  $\text{Cu}_3\text{SbS}_4$ , (b)  $\text{CuSbS}_2$ , (c)  $\text{Cu}_3\text{SbS}_3$  and (d)  $\text{Cu}_{12}\text{Sb}_4\text{S}_{13}$  NCs.

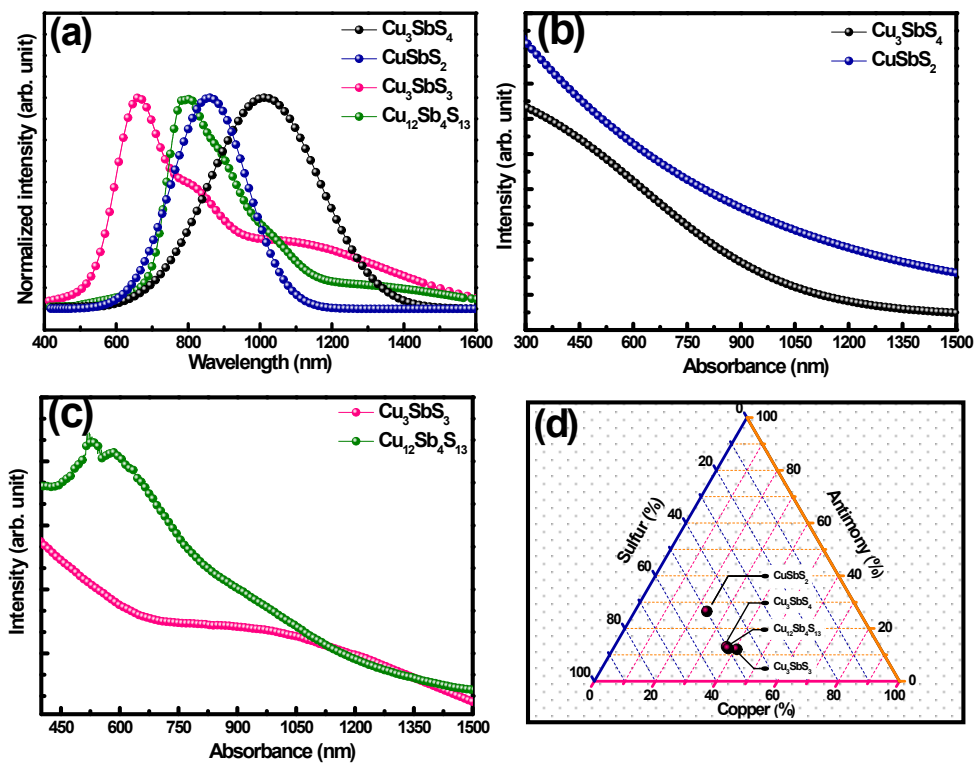

Fig. S8. (a) Normalized PL spectra of  $\text{Cu}_3\text{SbS}_4$ ,  $\text{CuSbS}_2$ ,  $\text{Cu}_3\text{SbS}_3$  and  $\text{Cu}_{12}\text{Sb}_4\text{S}_{13}$ , UV-Vis absorption spectra of (b)  $\text{Cu}_3\text{SbS}_4$  and  $\text{CuSbS}_2$  NCs and (c)  $\text{Cu}_3\text{SbS}_3$  and  $\text{Cu}_{12}\text{Sb}_4\text{S}_{13}$  NCs, (d) ternary phase diagram showing compositions of copper, antimony, and sulfur of the four Cu-Sb-S based phases determined using EDS.



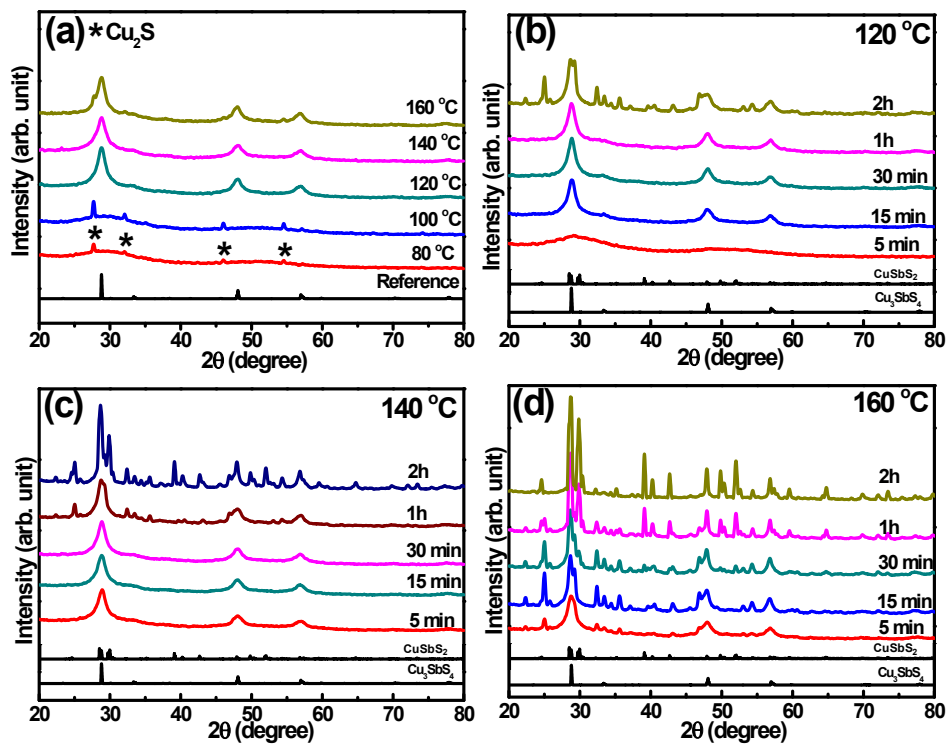

Fig. S9. XRD patterns of  $\text{Cu}_3\text{SbS}_4$  NCs at (a) different reaction temperature for 15 min. and (b, c, d) at different reaction time at a given temperature. Major diffraction peaks in plot (a) are correspond to  $\text{Cu}_2\text{S}$  phase formation at 80 and 100 °C.

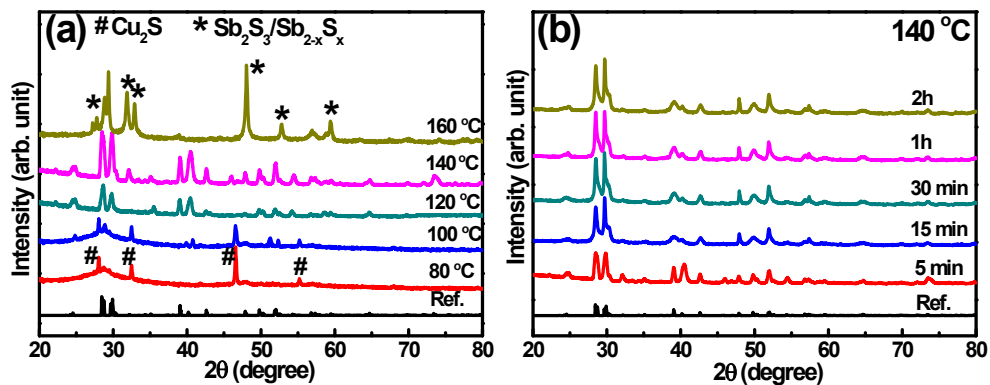

Fig. S10. XRD patterns of CuSb<sub>2</sub> NCs at (a) different reaction temperature for 15 min. and (b) at different reaction time at 140 °C. Major diffraction peaks in plot (a) are correspond to Cu<sub>2</sub>S phase formation at 80 and 100 °C.

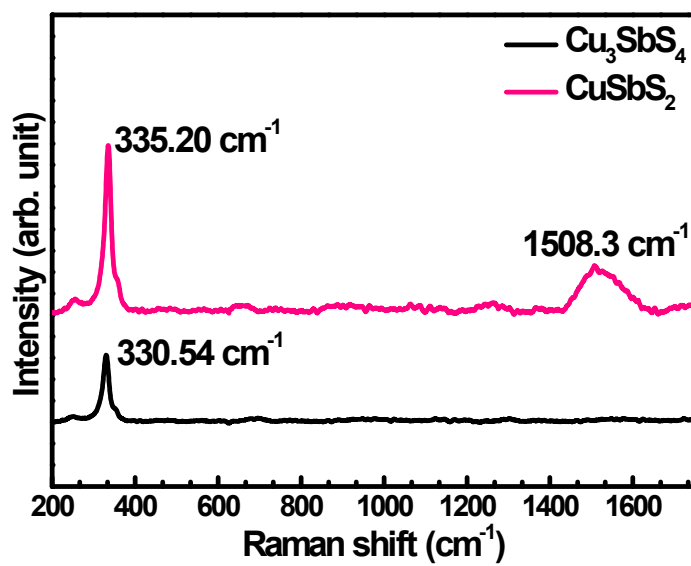

Fig. S11. Raman spectra of a selected Cu<sub>3</sub>Sb<sub>4</sub> and CuSb<sub>2</sub> NCs.

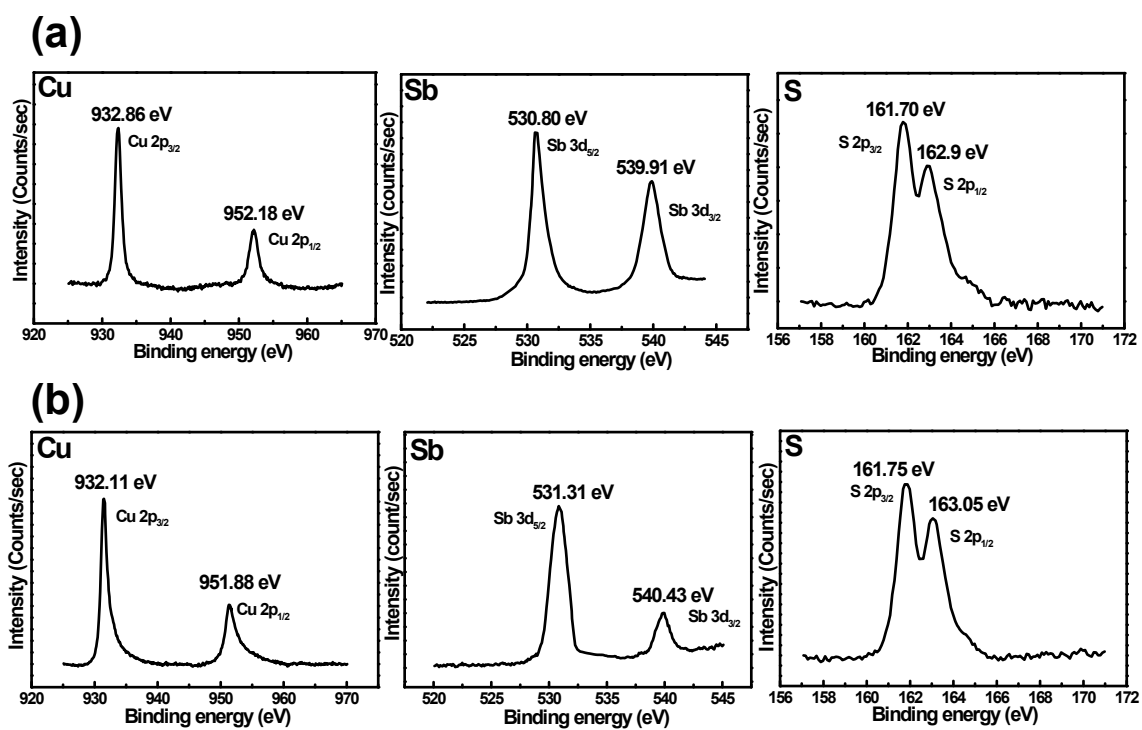

Fig. S12. XPS spectra of an optimized (a)  $\text{Cu}_3\text{Sb}_4$  and (b)  $\text{CuSbS}_2$  NCs.

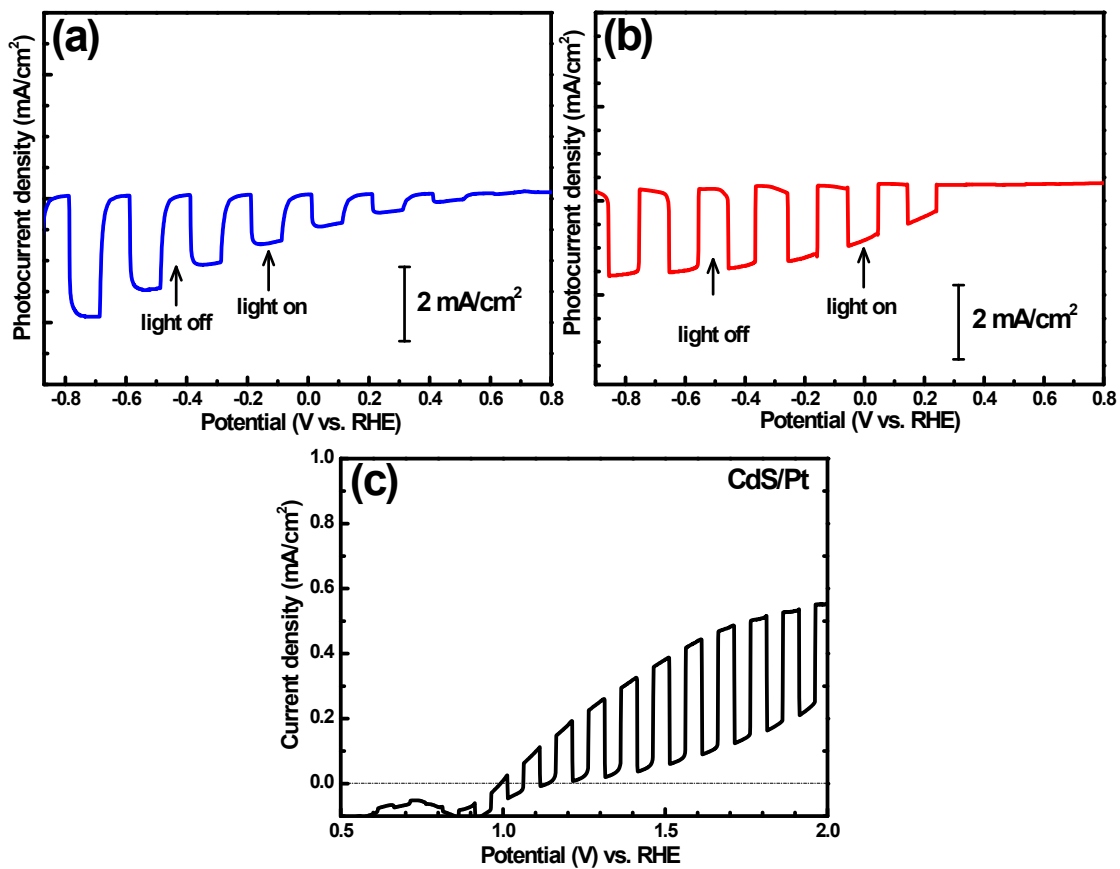

Fig. S13. PEC performance of (a) Cu<sub>3</sub>SbS<sub>4</sub>/CdS/Pt and of (b) CuSbS<sub>2</sub>/CdS/Pt photocathode in non-sacrificial reagent of 0.5 M H<sub>2</sub>SO<sub>4</sub> and (c) PEC performances of CdS/Pt electrode in 0.5 M KH<sub>2</sub>PO<sub>4</sub>/0.5 M Na<sub>2</sub>SO<sub>4</sub>.

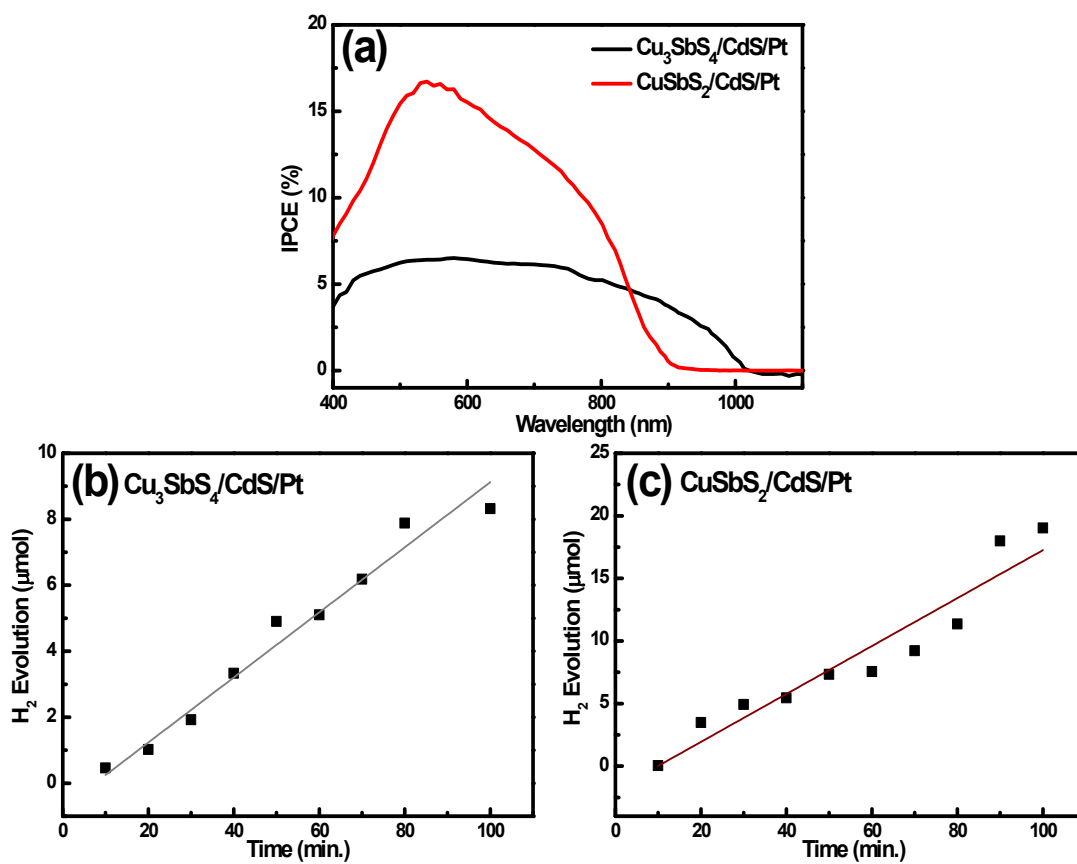

Fig. S14. (a) IPCE and, (b) and (c)  $\text{H}_2$  evolution performance of a  $\text{Cu}_3\text{SbS}_4/\text{CdS}/\text{Pt}$  and  $\text{CuSbS}_2/\text{CdS}/\text{Pt}$  photocathodes respectively.

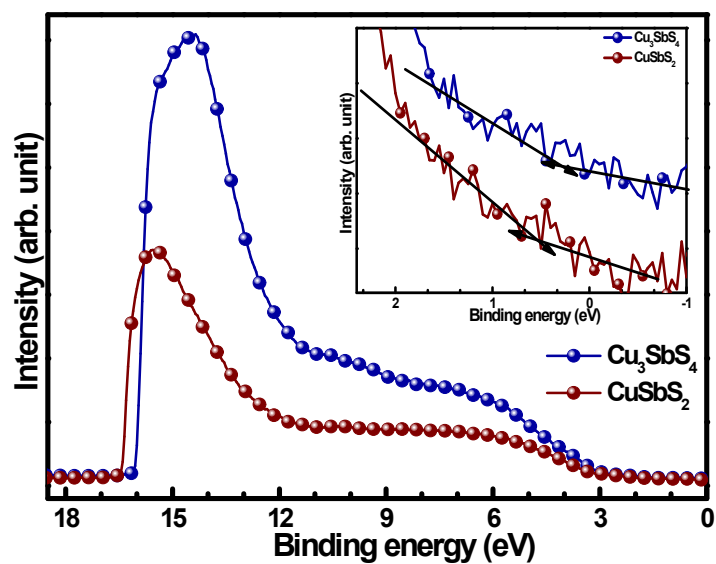

Fig. S15. UPS spectra of  $\text{Cu}_3\text{SbS}_4$  and  $\text{CuSbS}_2$  NCs. Inset of Fig. shows the enlarged region of cut-off of the secondary photoelectrons regions with He I excitation energy of 21.22 eV.

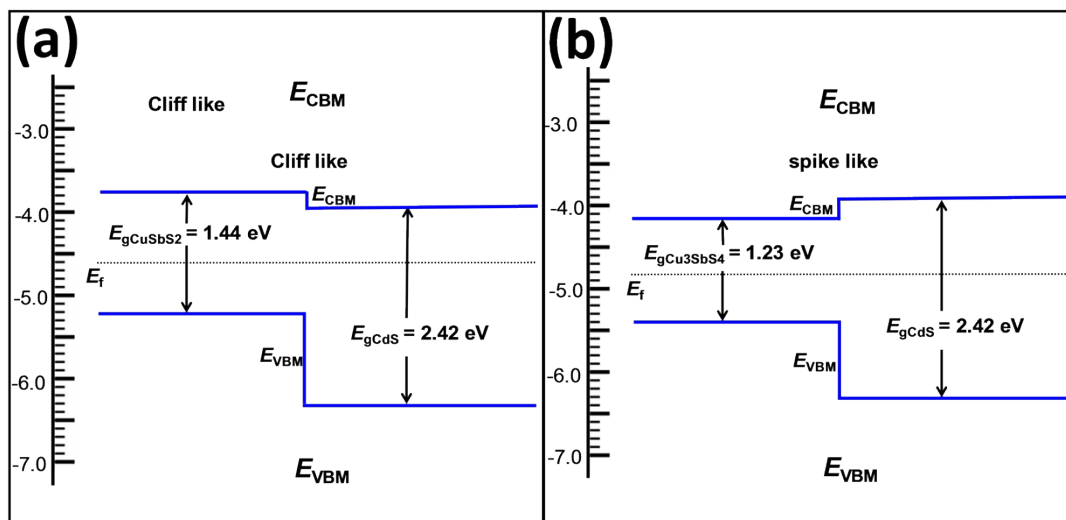

Scheme S2. The band alignment of the a)  $\text{CuSbS}_2/\text{CdS}$  and a)  $\text{Cu}_3\text{SbS}_4/\text{CdS}$  heterojunction materials.

Table S1. Representative results of the synthesis of different materials by using various DESs.

| Name                           | Method                    | Size (nm)    | Shape              | Application/remark                   | Type of DESs       | Temp.                      | Ref. |
|--------------------------------|---------------------------|--------------|--------------------|--------------------------------------|--------------------|----------------------------|------|
| Ag TF                          | Electrodeposition         | 20-80        | Nanoporous network | Hydrophilic nature                   | ChCl-EG            | 50 °C                      | S3   |
| ZnO                            | One pot                   | 60           | Twin-cones         | --                                   | ChCl-urea          | 70 °C                      | S4   |
| Zn TF                          | Electrodeposition         | --           | --                 | Electrochemical Properties           | ChCl-EG            | 30 °C                      | S5   |
| Au                             | One pot                   | 17.74        | Nanowires          | Catalyst                             | ChCl-urea, ChCl-EG | 40 °C                      | S6   |
| PbS                            | Hot injection             | 31, 100~2500 | Star shape         | --                                   | ChCl-urea          | 140 °C, 14 min             | S7   |
| Pt                             | Electrodeposition         | ~200         | Nanoflowers        | Catalyst                             | ChCl-urea          | 80 °C                      | S8   |
| NiCl <sub>2</sub>              | Ionothermal method        | 100          | Nanosheets         | Sodium-ion batteries                 | ChCl-urea          | 150 °C, 4 h,               | S9   |
| NiO                            | Ionothermal method        | 4-6          | Nanoflowers        | Pseudo-capacitive Electrode          | ChCl-urea          | 150 °C, 40 min             | S9   |
| CoFe                           | Electrodeposition         | 10-20        | Porous Nanosheets  | Magnetic adsorbents                  | ChCl-urea          | 260 °C, 40-55 min.         | S10  |
| Pd                             | Electrodeposition         | 223 ± 19     | Concave Disdyakis  | Shape-controlled Synthesis, catalyst | ChCl-urea          | 60 °C                      | S11  |
| Zn Phosphate                   | Hydrothermal              | --           | Lamellar crystals  | photoluminescence and photochromic   | ChCl-OA            | 180 °C for 3 d             | S12  |
| Mn <sub>2</sub> O <sub>3</sub> | One pot heat up           | 18           | Spherical NPs      | Paramagnetic behavior                | ChCl-EG            | 140 °C, 2 min              | S13  |
| CIGS                           | One pot electrodeposition | TF           | --                 | TFSC                                 | ChCl-urea          | --                         | S14  |
| CIGS                           | Electrodeposition         | TF           | --                 | TFSCs_7.9%                           | ChCl-urea          | Annealing at 550 °C        | S15  |
| CZTS                           | Co-electrodeposition      | TF           | --                 | TFSCs_3.87 %                         | ChCl-urea          | Annealing at 550 °C for 1h | S16  |
| CIGS                           | Electrodeposition         | TF           | --                 | TFSCs_10.1%                          | ChCl-urea          | Annealing at 550 °C for 1h | S17  |

Where, TF= thin film, ChCl = choline chloride, EG = ethylene glycol, OA= oxalic acid, TFSC = thin film solar cell

Table S2. Viscosities of the commonly used DESs during different materials synthesis used in Table S1.

| Type of solvent | Salt ratio                                 | Viscosity (cP) |
|-----------------|--------------------------------------------|----------------|
| Reline          | Choline chloride: Urea<br>(1:2)            | 169 (25 °C)    |
| Ethaline        | Choline chloride: Ethylene glycol<br>(1:2) | 37 (25 °C)     |
| Glyceline       | Choline chloride: Glycerol<br>(1:2)        | 259(25 °C)     |

## REFERENCES

1. C. W. Hong, S. W. Shin, M. P. Suryawanshi, M. G. Gang, J. Heo and J. H. Kim, *ACS appl. Mater. Interfaces*, 2017, **9**, 36733-36744.
2. M. P. Suryawanshi, U. V. Ghorpade, S. W. Shin, M. G. Gang, X. Wang, H. Park, S. H. Kang and J. H. Kim, *ACS Catal.*, 2017, **7**, 8077-8089.
3. C. Gu, X. Xu and J. Tu, *J. Phys. Chem. C*, 2010, **114**, 13614-13619.
4. J.-Y. Dong, Y.-J. Hsu, D. S.-H. Wong and S.-Y. Lu, *J. Phys. Chem. C*, 2010, **114**, 8867-8872.
5. A. H. Whitehead, M. Pözlner and B. Gollas, *J. Electrochem. Soc.*, 2010, **157**, D328-D334.
6. M. Chirea, A. Freitas, B. S. Vasile, C. Ghitulica, C. M. Pereira and F. Silva, *Langmuir*, 2011, **27**, 3906-3913.
7. A. Querejeta-Fernández, J. C. Hernández-Garrido, H. Yang, Y. Zhou, A. Varela, M. Parras, J. J. Calvino-Gámez, J. M. González-Calbet, P. F. Green and N. A. Kotov, *ACS Nano*, 2012, **6**, 3800-3812.
8. L. Wei, Y.-J. Fan, H.-H. Wang, N. Tian, Z.-Y. Zhou and S.-G. Sun, *Electrochim. Acta*, 2012, **76**, 468-474.
9. X. Ge, C. Gu, Y. Lu, X. Wang and J. Tu, *J. Mater. Chem. A*, 2013, **1**, 13454-13461.
10. X. Ge, C. Gu, X. Wang and J. Tu, *J. Colloid Interface Sci.*, 2015, **454**, 134-143.
11. L. Wei, C.-D. Xu, L. Huang, Z.-Y. Zhou, S.-P. Chen and S.-G. Sun, *J. Phys. Chem. C*, 2015, **120**, 15569-15577.
12. P. C. Jhang, N. T. Chuang and S. L. Wang, *Angew. Chem.*, 2010, **122**, 4296-4300.
13. M. Karimi and M. Eshraghi, *J. Alloys Compd.*, 2017, **696**, 171-176.
14. M. Harati, J. Jia, K. Giffard, K. Pellarin, C. Hewson, D. A. Love, W. M. Lau and Z. Ding, *Phys. Chem. Chem. Phys.*, 2010, **12**, 15282-15290.
15. J. C. Malaquias, D. Regesch, P. J. Dale and M. Steichen, *Phys. Chem. Chem. Phys.*, 2014, **16**, 2561-2567.



16. H. Chen, Q. Ye, X. He, J. Ding, Y. Zhang, J. Han, J. Liu, C. Liao, J. Mei and W. Lau, *Green Chem.*, 2014, **16**, 3841-3845.

17. Y. Zhang, J. Han and C. Liao, *J. Electrochem. Soc.*, 2016, **163**, D689-D693.
